# Supplementary material for: Glucose biosensors based on Michael addition crosslinked poly(ethylene glycol) hydrogels with chemo-optical sensing microdomains
Source: Royal Society of Chemistry journal article supplement (doi:10.1039/d2tb02339c), 2023-01-01

## Glucose biosensors based on Michael addition crosslinked poly(ethylene glycol) hydrogels with chemo-optical sensing microdomains

Tyrell J. Williams<sup>†</sup>, Ananthakrishnan S. Jeevarathinam<sup>†</sup>, Faraz Jivan, Victoria Baldock, Paul Kim, Michael J. McShane, and Daniel L. Alge

### Supplementary Information

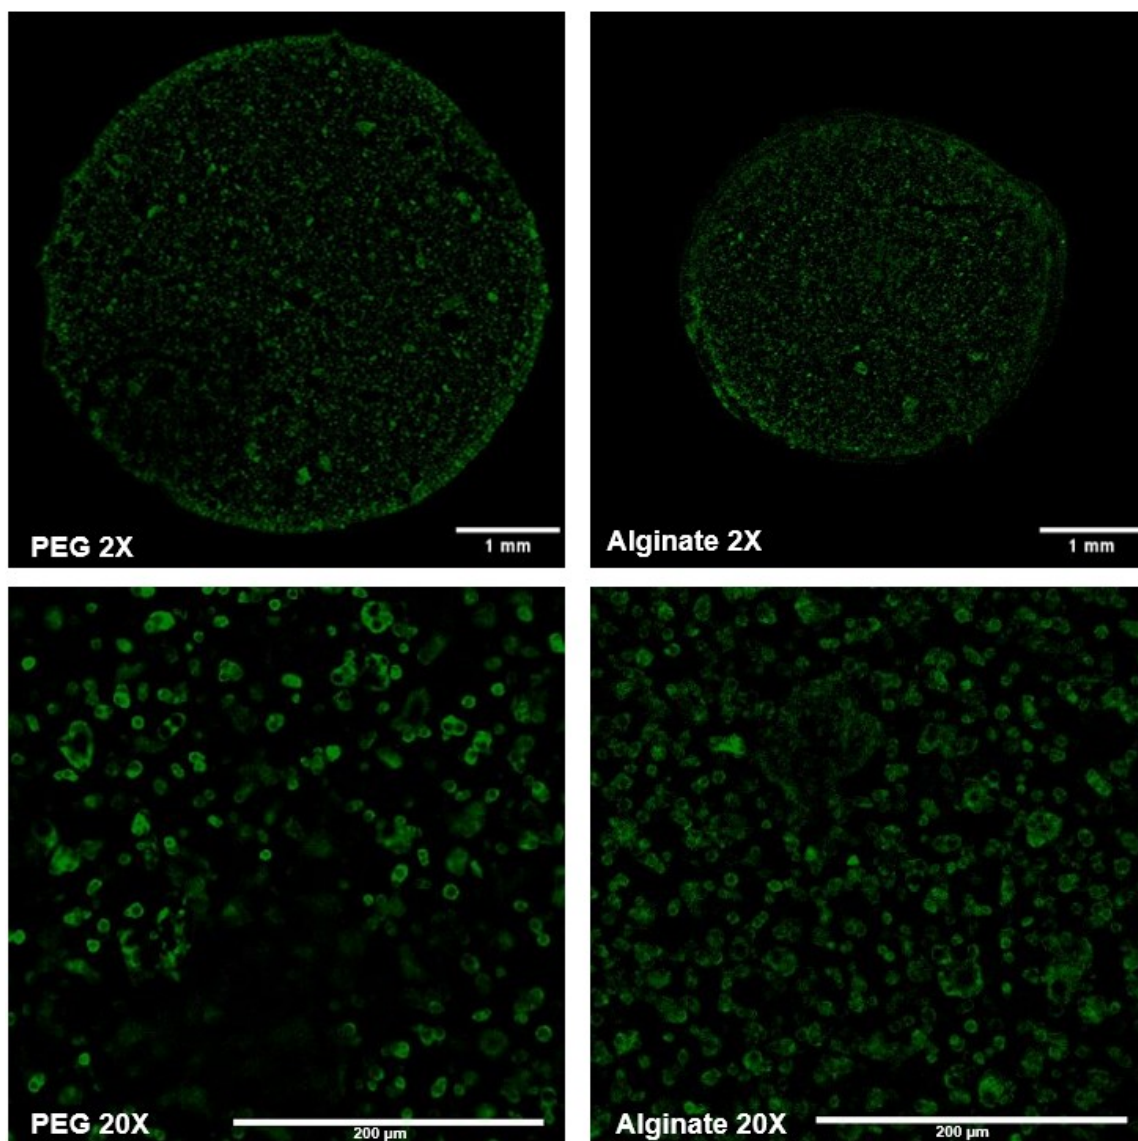

**Figure S1.** 2x and 20x Confocal images of PEG and Alginate hydrogels demonstrating differences in size after swelling. Relaxed state = 4 mm.

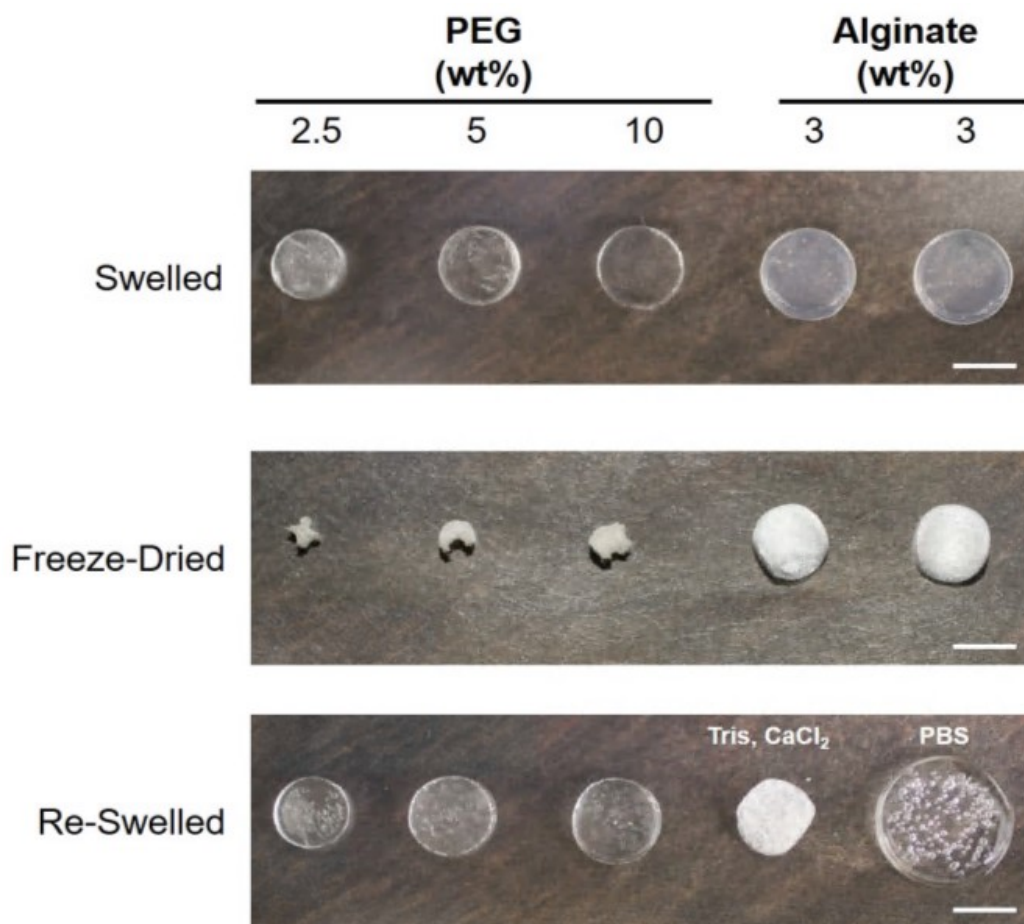

**Figure S2.** Representative images of PEG and alginate gels before lyophilization, after lyophilization, and after re-swelling in buffer. Image scale bar = 5 mm.

**Figure S3.** Lifetime response versus oxygen concentration for sensing microdomains in PEG and alginate hydrogel platforms

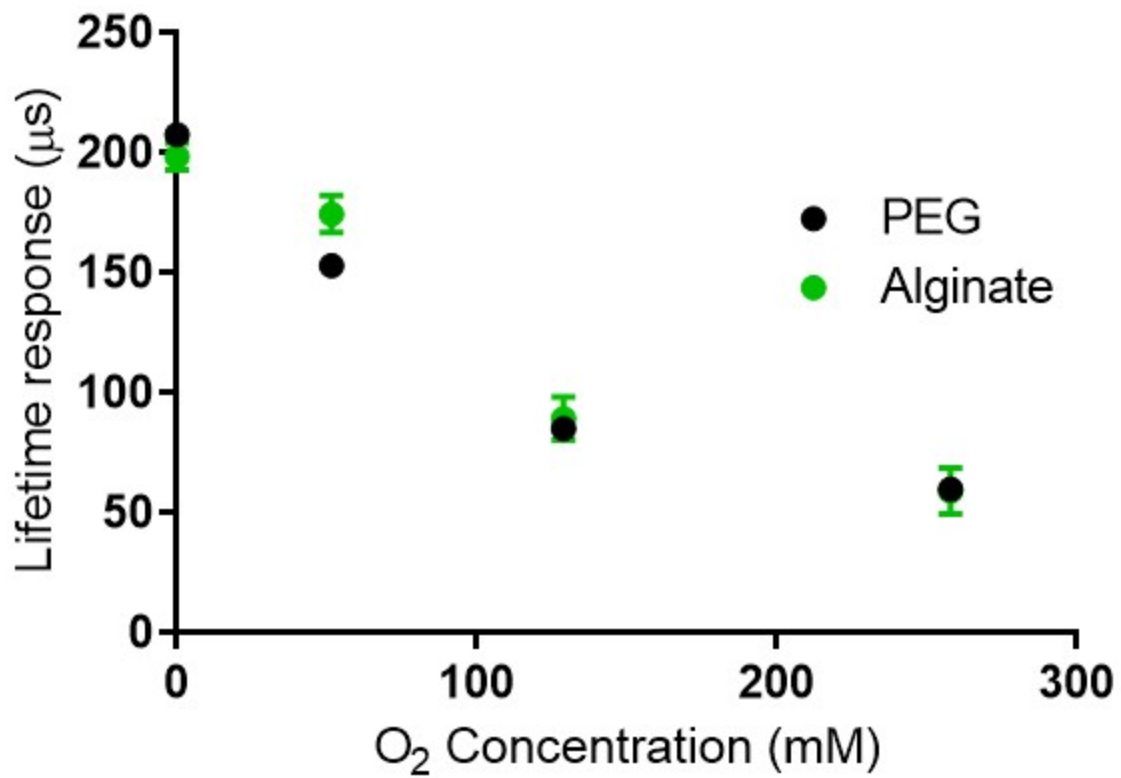

Supplement: d2tb02339c1.pdf [file d2tb02339c1.pdf]
